# Supplementary material for: Engineering the electronic states of Ni3FeNviazinc ion regulation for promoting oxygen electrocatalysis in rechargeable Zn–air batteries
Source: Royal Society of Chemistry journal article supplement (doi:10.1039/d0ta10370e), 2020-12-14
Supplement: d0ta10370e1.pdf [file d0ta10370e1.pdf]

## Supporting Information

### **Engineering the Electronic States of Ni<sub>3</sub>FeN via Zinc Ions Regulating for Promoted Oxygen Electrocatalysis in Rechargeable Zn-air Batteries**

Xiaoyang He<sup>a</sup>, Yuhui Tian<sup>a,d</sup>, Zengliang Huang<sup>a</sup>, Li Xu<sup>a,\*</sup>, Jianchun Wu<sup>a,c</sup>, Junchao Qian<sup>b</sup>, Jianming Zhang<sup>a</sup>, Henan Li<sup>a,\*</sup>

<sup>a</sup> Institute for Energy Research, School of Chemistry and Chemical Engineering, School of Materials Science and Engineering, Key Laboratory of Zhenjiang, Jiangsu University, Zhenjiang 212013, P. R. China. E-mail: [xulichem@ujs.edu.cn](mailto:xulichem@ujs.edu.cn); [lh@ujs.edu.cn](mailto:lh@ujs.edu.cn).

<sup>b</sup> Jiangsu Key Laboratory for Environment Functional Materials, Suzhou University of Science and Technology, Suzhou 215009, P. R. China.

<sup>c</sup> Institute of Nuclear Science and Technology, Sichuan University, Chengdu, 610064, P. R. China.

<sup>d</sup> Centre for Clean Environment and Energy, Griffith School of Environment, Gold Coast Campus, Griffith University, QLD 4222, Australia.

# Experimental details

## Chemical.

Urea ( $\text{CO}(\text{NH}_2)_2$ ), 99%, ferric(III) nitrate nonahydrate ( $\text{Fe}(\text{NO}_3)_3 \cdot 9\text{H}_2\text{O}$ , 99%), nickel(II) nitrate hexahydrate ( $\text{Ni}(\text{NO}_3)_2 \cdot 6\text{H}_2\text{O}$ , 99%), zinc(II) nitrate hexahydrate ( $\text{Zn}(\text{NO}_3)_2 \cdot 6\text{H}_2\text{O}$ ), hydrochloric acid (HCl, 36%) and ethanol ( $\text{C}_2\text{H}_5\text{OH}$ , 99.7%) were obtained from Sino Pharm Chemical Reagent Co., Ltd (Shanghai, China). Commercial Pt/C (20 wt% Pt/C) and  $\text{RuO}_2$  were procured from Alfa Aesar (China) Chemicals Co. Ltd (Shanghai). Nafion (10 wt%) was purchased from Sigma-Aldrich Chemie GmbH (Shanghai, China). Reduced graphene oxide was purchased from Nanjing XFNANO Materials Tech Co., Ltd (Nanjing, China).

## Synthesis of the Zn-Ni<sub>3</sub>FeN/NG.

First, the g-C<sub>3</sub>N<sub>4</sub> was synthesized via a simple annealing process. The g-C<sub>3</sub>N<sub>4</sub> was synthesized by carbonization urea at 250 °C for 2 h followed by a subsequent thermal treatment at 600 °C for 2 h with a temperature ramping rate of 1 °C min<sup>-1</sup> in N<sub>2</sub> atmosphere. In a typical experiment, 0.6 mmol nickel nitrate hexahydrate, 0.2 mmol ferric nitrate nonahydrate, 0.1 mmol zinc nitrate hexahydrate, and 6 mmol urea were dissolved in 20 ml deionized water, then mixed with 20 ml aqueous solution containing 20 mg reduced graphene oxide and 0.2 g g-C<sub>3</sub>N<sub>4</sub>, the mixture was under vigorous magnetic stirring to form a hydrogel. The resultant mixture was then transferred to a Teflon-lined steel autoclave and heated at 120 °C for 18 h in an oven. The precipitates were collected by centrifugation and washed with deionized water and ethanol several times, then centrifuged and dried in a vacuum oven at 60 °C. The dried solid was firstly transferred into a quartz tube with a closed one-terminal. Then the other end of the quartz tube was installed with a mating flange. The vacuum pump was then utilized to remove the internal air from the quartz tube. Next, the quartz tube was transferred into a small muffle furnace (KSL-1100X-S) that had been heated to 850 °C. After 10 min, the heated quartz furnace was immediately taken out of the small muffle furnace and placed in a fume hood. After cooling down to room temperature, the calcined black sample was taken out of the quartz tube and then dispersed in an H<sub>2</sub>SO<sub>4</sub> solution (0.5 mol L<sup>-1</sup>). After being continuously stirred for 12 h, the above sample was washed until neutral with deionized water, and then dried at 60 °C. The Zn-Ni<sub>3</sub>Fe alloys/nitrogen-doped graphene (Zn-Ni<sub>3</sub>Fe/NG) was obtained (Fig. S1). Finally, to obtain the Zn-doped Ni<sub>3</sub>FeN/NG, the dried sample was placed in a tube furnace and annealed at 800 °C for 1.5 h in NH<sub>3</sub> at a heating rate of 5 °C min<sup>-1</sup>. After natural cooling to room temperature, the Zn-Ni<sub>3</sub>FeN/NG was collected.

## Synthesis of the Zn-Ni<sub>4</sub>N/NG.

The Zn-Ni<sub>4</sub>N/NG was prepared through the same process as that of Zn-Ni<sub>3</sub>FeN/NG except that Fe source was not added to the reaction system and the amount of nickel nitrate hexahydrate was changed to 0.8 mmol.

## Synthesis of the Zn-FeN/NG.

The Zn-FeN/NG was prepared through the same process as that of Zn-Ni<sub>3</sub>FeN/NG except that Ni source was not added to the reaction system and the amount of ferric nitrate nonahydrate was changed to 0.8 mmol.

## Synthesis of the Ni<sub>3</sub>FeN/NG.

The Ni<sub>3</sub>FeN/NG was prepared through the same process as that of Zn-Ni<sub>3</sub>FeN/NG except that Zn source was not added to the reaction system and the amount of ferric nitrate hexahydrate and nickel nitrate hexahydrate was changed to 0.65, 0.25 mmol, respectively.

## Characterizations.

The phase purity and crystalline phases of all samples were characterized by X-ray diffraction (XRD, Bruker D8 diffractometer) with Cu K $\alpha$  radiation ( $\lambda = 1.5418 \text{ \AA}$ ) in 2 theta range of 10-80°. The form of the elements on the surface of Zn-Ni<sub>3</sub>FeN/NG was explored by X-ray photoelectron spectroscopy (XPS, ESCALAB 250x1, Thermo VG Scientific, USA) at 1 kV. The field-emission scanning electron microscopy (FE-SEM) images with a field-emission scanning electron microscope (JEOL JSM-7800F) were recorded. Transmission electron microscopy (TEM, JEOL JEM-2010) images and energy-dispersive X-ray (EDX) mapping measurements were measured to research the morphologies of the synthesized materials. The specific surface areas of as-prepared electrocatalysts were confirmed by Brunauer-Emmett-Teller (BET, Tristar 3020).

## Electrochemical measurement.

Electrocatalytic properties of all synthesized materials were investigated on CHI 760E (CHI Shanghai, Inc.) electrochemical workstation with a traditional three-electrode system. The reference electrode was an Ag/AgCl immersed in a saturated KCl solution. A graphite rod was utilized as the counter electrode. The working electrodes were rotating disk electrodes (RDE, diameter = 3 mm) and rotating ring-disk electrode (RRDE, the diameter of glassy carbon = 4 mm, and diameter of platinum ring = 7 mm) modified by as-prepared electrocatalysts. The modification of the working electrodes was as follows: 5 mg of sample was ultrasonically dispersed in a mixture of 500  $\mu$ L ethanol, 500  $\mu$ L deionized water, and 20  $\mu$ L 10 wt% Nafion to obtain the slurry. 7.5 and 10  $\mu$ L slurries were then dropwise added onto cleaned RDE and RRDE, and then dried at room temperature, respectively. In contrast, electrodes modified by 20 wt% Pt/C were prepared with the same method.

The electrolyte was KOH (0.1 mol L<sup>-1</sup>) in the test system. All potentials were converted to reversible hydrogen electrodes (RHE). The electron transfer number ( $n$ ) and hydrogen peroxide (H<sub>2</sub>O<sub>2</sub>) yield of Zn-Ni<sub>3</sub>FeN/NG and 20 wt% Pt/C during ORR were measured by RRDE electrodes and calculated by Eq.(1) and (2). The ring potential was kept at 0.286 V.  $N$  is the collection coefficient of H<sub>2</sub>O<sub>2</sub> with a value of 0.37 in Eq.(1) and (2).  $I_d$  and  $I_r$  represent the disk current and the ring current, respectively.

$$n = 4 I_d / (I_d + I_r / N) \quad (1)$$

$$HO_2^- = 200(I_r / N) / (I_d + I_r / N) \quad (2)$$

At the rotating speed of 1600 rpm, the stability of Zn-Ni<sub>3</sub>FeN/NG and 20 wt% Pt/C were elevated for up to 10 h by the current-time(i-t) chronoamperometric response tests with the rotation speed of 1600 rpm and a sweep rate of 10 mV s<sup>-1</sup> in 0.1 mol L<sup>-1</sup> O<sub>2</sub>-saturated KOH.

The OER tests were carried out by using a similar method as ORR. The same amount of catalysts was loaded on the rotating disk working electrode. LSV curves were recorded at the rotating speed of 1600 rpm in N<sub>2</sub>-saturated 0.1 M KOH. The data was iR corrected using the iR-drop compensation feature of CHI 760E workstation while conducting the measurements. The Tafel slopes were calculated according to the Tafel Eq. (3) based on the LSV curves.

$$\eta = b \log (j / j_0) \quad (3)$$

where  $\eta$  is the potential,  $b$  is the Tafel slope,  $j$  is the current density, and  $j_0$  is the exchange current density.

In order to estimate the electrochemical active surface area (ECSA) of the catalytic surface through RDE, the electrochemical double layer capacitances ( $C_{dl}$ ) in the non-Faradaic potential region were obtained by Eq.(4) derived from changing CV curves at the scan rate range between 2,5,10,15,20,25 and 50 mV s<sup>-1</sup>.

$$ECSA = C_{dl}/C_s \quad (4)$$

Where  $C_{dl} = IC/v$ .  $IC$  is the sum of charging/discharging at 1.0 V (vs. RHE) from different CV curves.  $V$  represents the scan rate.  $C_s$  is the capacitance of electrocatalytic materials on the smooth surface in the same electrolyte or specific capacitance of the catalysts.

The mass activity was calculated using Eq.(5); the specific activity was calculated using Eq.(6).  $J_k$  was calculated using Eq.(7).

$$M = J_k^{@0.85V} / \text{loading}_{\text{cat}} \quad (5)$$

$$S = J_k^{@0.85V} / (ECSA * \text{loading}_{\text{cat}}) \quad (6)$$

$$J_k^{@0.85V} = (J_d * J^{@0.85V}) / (J_d - J^{@0.85V}) \quad (7)$$

where  $J_k$  is the ORR kinetic current,  $J_d$  is the limit current.

## Liquid Zn-air battery measurement.

To assemble Zn-air batteries, the slurry of Zn-Ni<sub>3</sub>FeN/NG was dropwise added onto a carbon cloth with an area of 1 cm<sup>2</sup> to ensure a loading amount of 1 mg cm<sup>-2</sup> as the air cathode. The polished Zn plate was used as the anode. The mixed solution of 6 mol L<sup>-1</sup> KOH and 0.2 mol L<sup>-1</sup> Zn(CH<sub>3</sub>COO)<sub>2</sub> was the electrolyte solution. The charging and discharging polarization curves were measured by LSV polarization curves with a scan rate of 10 mV s<sup>-1</sup> and calculated the power density by Eq.(8):

$$\text{power density} = \text{current density} \times \text{voltage} \quad (8)$$

The galvanostatic (20 mA cm<sup>-2</sup>) discharging curve was measured and calculated the specific capacity by Eq. (9):

$$\text{specific capacity} = (\text{current} \times \text{test hours}) / (\text{consumed Zn plate mass}) \quad (9)$$

The charge-discharge cycle stability was tested with a cycle period of 20 min (10 min for charging and 10 min for discharging).

In contrast, the mixture slurry of RuO<sub>2</sub> and 20 wt% Pt/C with a mass ratio of 1:1 was dropwise added onto a carbon cloth with an area of 1 cm<sup>2</sup> to ensure a loading amount of 1 mg cm<sup>-2</sup> as the air cathode. It was also used to assemble the Zn-air battery and performed the practical application at the same conditions.

## DFT calculations

The computational calculations were carried out using density function theory (DFT) in Vienna ab-initio simulation package (VASP). The generalized gradient approximation (GGA) in the form of the Perdew-Burke-Ernzerhof (PBE)

was used to treat the exchange-correlation function. A kinetic energy cut-off of 400 eV was used for plane-wave expansion. The Brillouin zone was sampled with a 4×4×1 Gamma centered special k-points grid for geometry optimization. All models were established with cell dimension of 7.53 Å×10.65 Å×20 Å, with a vacuum slab of 20 Å in c direction to avoid the artificial interactions between the periodic images. A convergence criterion for the electronic self-consistent loop of 1×10<sup>-5</sup> eV for structure optimization. All the models were geometrically optimized prior to gain all the atoms sitting at the minimum energy point.

The four-electron ORR mechanism in alkaline medium can be summarized as follows:

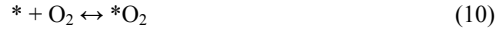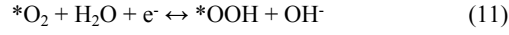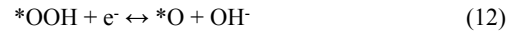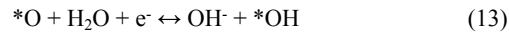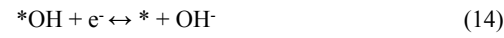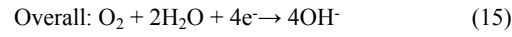

where \* represents an active site on the lattice surface. The adsorption energy ( $\Delta E_{\text{ads}}$ ) for ORR was calculated as Eq.(16). The adsorption free energy ( $\Delta G_{\text{ads}}$ ) is obtained by Eq.(17).

$$E_{\text{ads}} = E_{\text{substrate} + \text{adsorbate}} - E_{\text{substrate}} - E_{\text{adsorbate}} \quad (16)$$

$$\Delta G = \Delta E + \Delta \text{ZPE} - T \cdot \Delta S \quad (17)$$

where  $\Delta E$  is the energy difference of reactants and products, obtained from DFT calculations;  $\Delta \text{ZPE}$  and  $\Delta S$  are the contributions to the free energy from the zero-point vibration energy and entropy, respectively. T is the temperature (298.15K). And the overpotential is defined as the difference between the potential mentioned above and equilibrium potential (1.23 V) in ORR, described as:

$$\eta = \max[\Delta G1, \Delta G2, \Delta G3, \Delta G4]/e + 1.23\text{V} \quad (18)$$

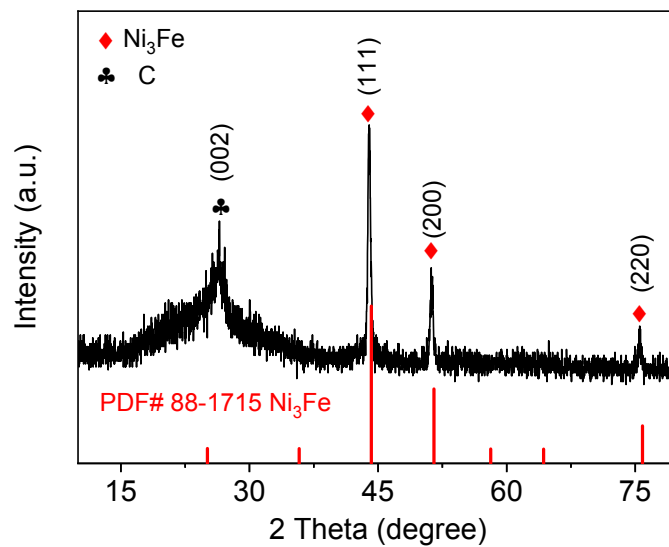

Fig. S1 XRD pattern of the Ni<sub>3</sub>Fe.

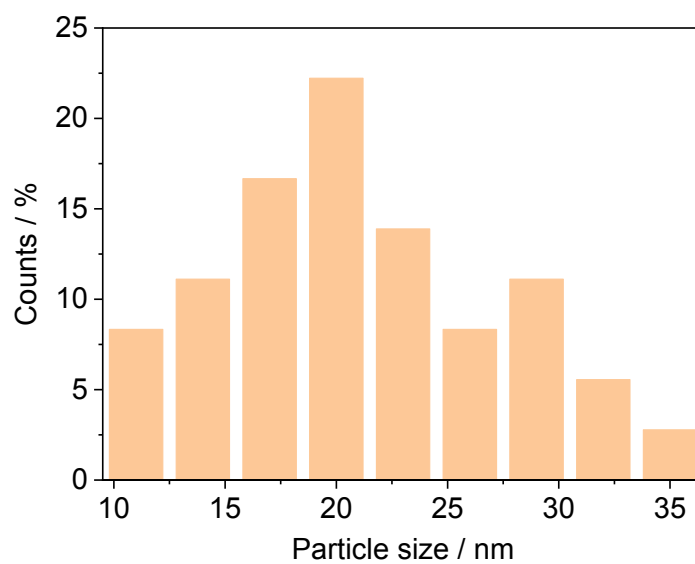

Fig. S2 Size histogram of particle diameters of Zn-Ni<sub>3</sub>FeN/NG.

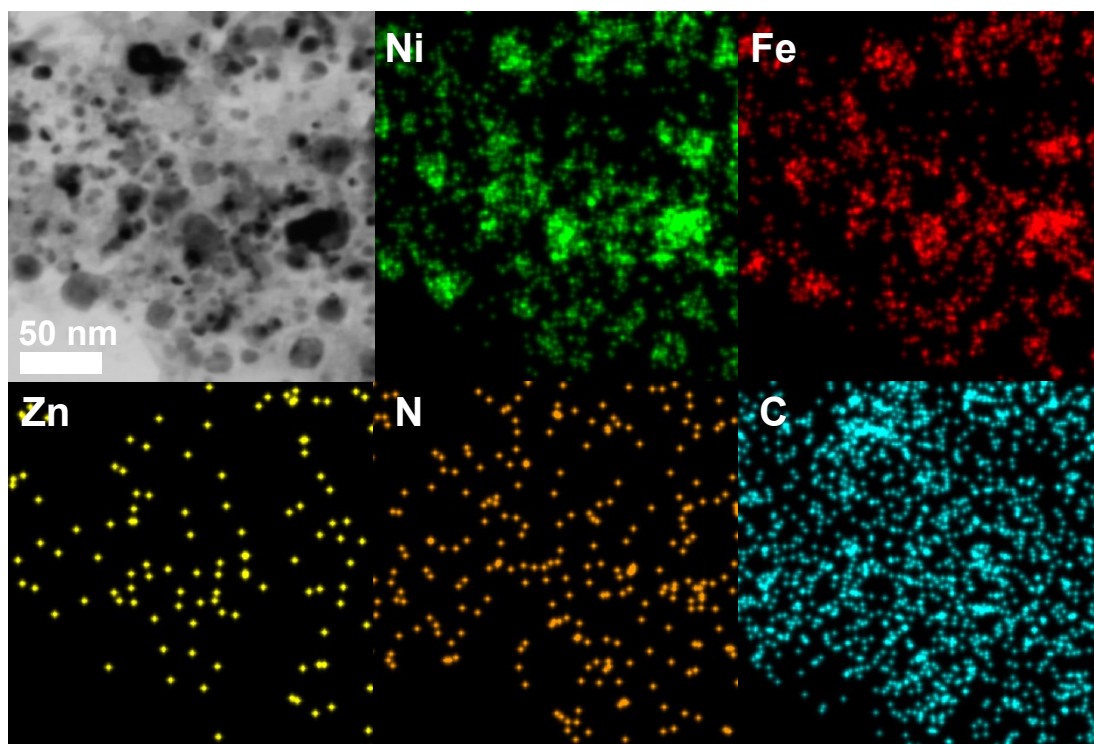

Fig. S3 TEM image and corresponding EDX mapping images of Zn-Ni<sub>3</sub>FeN/NG for Ni, Fe, Zn, N, and C.

Fig. S4 (a) XPS survey spectrum of the Zn-Ni<sub>3</sub>FeN/NG, XPS spectra of (b) C 1s and (c) O 1s elemental in the Zn-Ni<sub>3</sub>FeN/NG samples.

Fig. S5 N<sub>2</sub> adsorption and desorption isotherm curve and pore size distribution plots of (a), (b) Zn-N<sub>3</sub>FeN/NG; (c), (d) Zn-Ni<sub>4</sub>N/NG; (e), (f) Zn-FeN/NG and (g), (h) N<sub>3</sub>FeN/NG.

Fig. S6 (a) RRDE voltammograms of Zn-Ni<sub>3</sub>FeN/NG and Pt/C in O<sub>2</sub>-saturated 0.1 M KOH, (b) H<sub>2</sub>O<sub>2</sub>% obtained by RRDE technique for Zn-Ni<sub>3</sub>FeN/NG and Pt/C, and corresponding average electron transfer number (*n*).

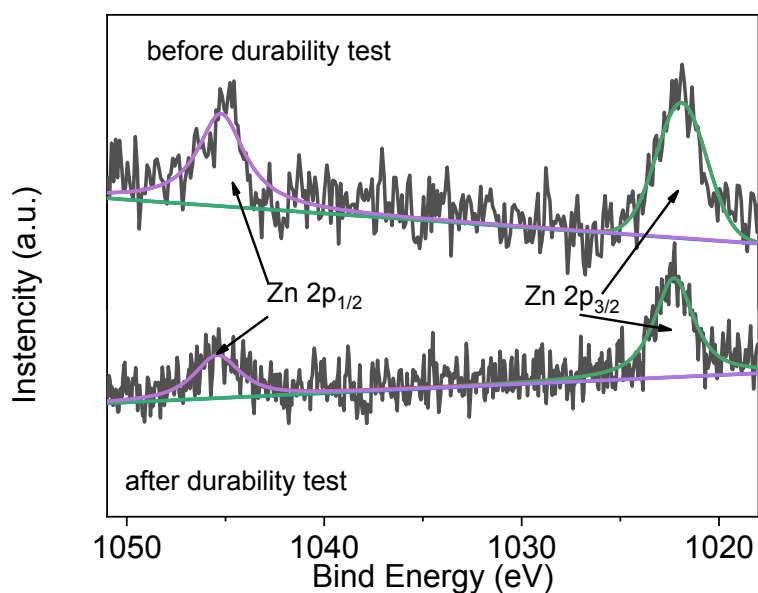

Fig. S7. XPS spectrum of Zn 2p before and after durability testing in the Zn-Ni<sub>3</sub>FeN/NG.



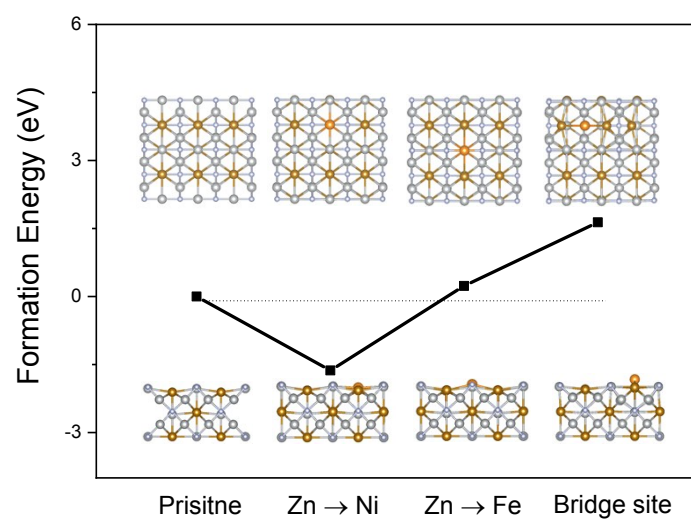

Fig. S8 The formation energy for pristine, a Zn atom replaces a Ni atom ( $\text{Zn} \rightarrow \text{Ni}$ ), a Zn atom replaces a Fe atom ( $\text{Zn} \rightarrow \text{Fe}$ ), Zn atom at the bridge site of two Fe atoms (Bridge site) of  $\text{Ni}_3\text{FeN}$ , respectively.

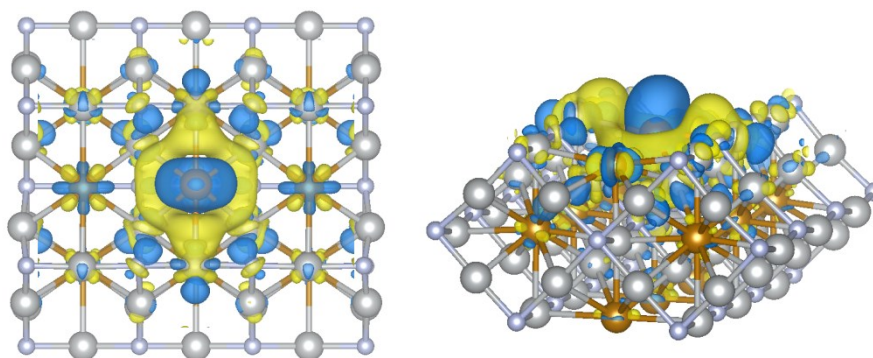

Fig. S9 Schematic illustration of the electron density difference of the Zn-doped  $\text{Ni}_3\text{FeN}$ .

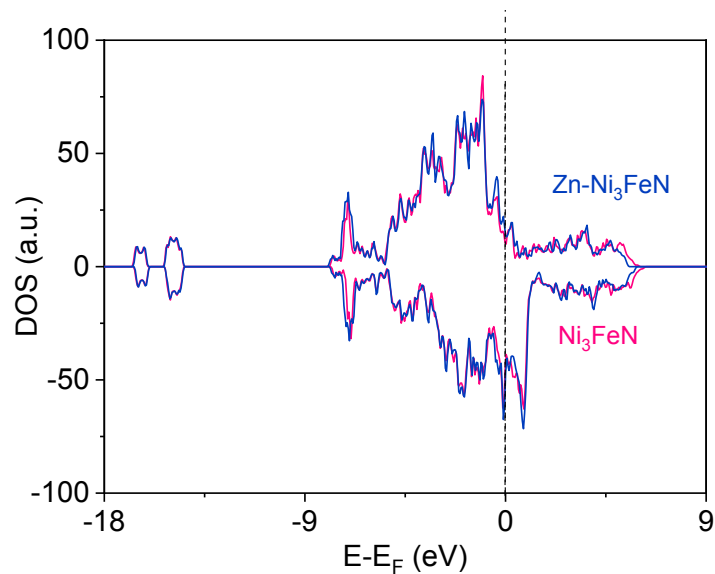

Fig. S10 Total density of states (DOS) of Zn-Ni<sub>3</sub>FeN and Ni<sub>3</sub>FeN. The Fermi level is set to zero.

Fig. S11 CVs in the region of 0.96 to 1.06 V vs. RHE at various scan rates and the corresponding linear fitting of the capacitive currents vs. scan rates to estimate the  $C_{dl}$ : (a), (b) Zn-N<sub>3</sub>FeN/NG; (c), (d) Zn-Ni<sub>4</sub>N/NG; (e), (f) Zn-FeN/NG; (g), (h) N<sub>3</sub>FeN/NG.

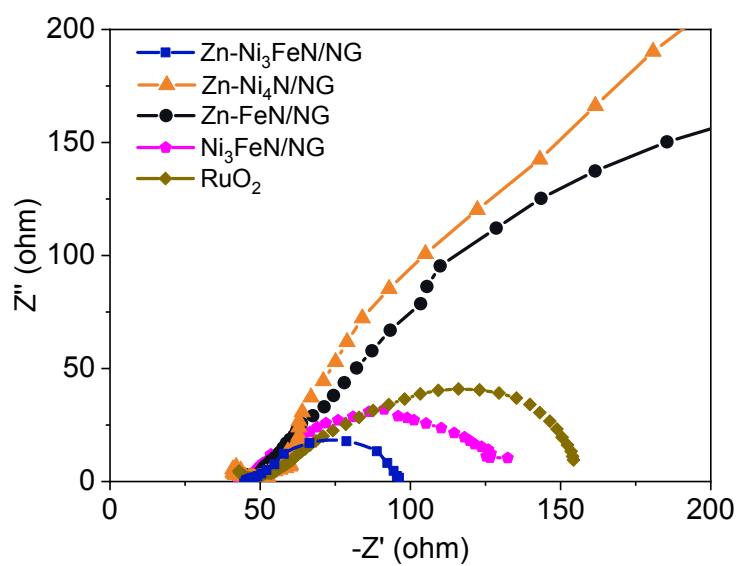

Fig. S12 Nyquist plots of Zn-N<sub>3</sub>FeN/NG, Ni<sub>3</sub>FeN/NG, Zn-Ni<sub>4</sub>N/NG, Zn-FeN/NG, and RuO<sub>2</sub> in 0.1 M KOH at 1.6 V (vs. RHE).

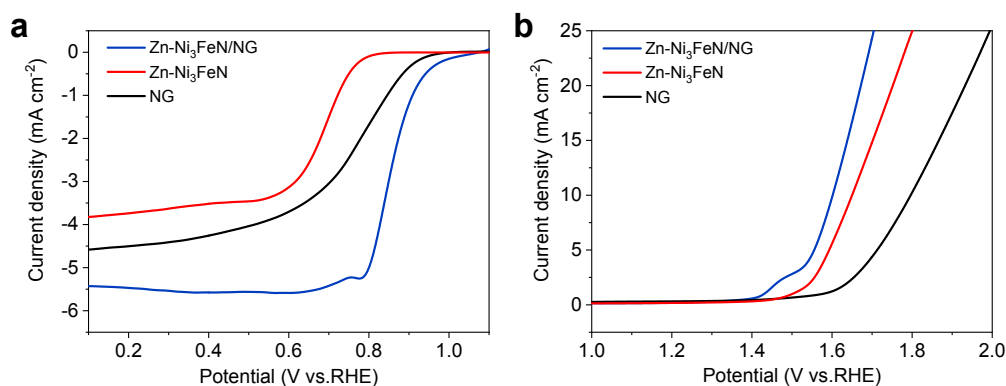

Fig S13. LSV curves for (a) ORR and (b) OER for Zn-Ni<sub>3</sub>FeN/NG, Zn-Ni<sub>3</sub>FeN, and NG.

Table S1 Specific surface areas and pore structures of the samples.

| Samples                   | $S_{\text{BET}}$ ( $\text{m}^2 \cdot \text{g}^{-1}$ ) | $V_p$ ( $\text{cm}^3 \cdot \text{g}^{-1}$ ) | $d$ (nm) |
|---------------------------|-------------------------------------------------------|---------------------------------------------|----------|
| Zn-Ni <sub>3</sub> FeN/NG | 778.33                                                | 2.20                                        | 4.048    |
| Zn-Ni <sub>4</sub> N/NG   | 291.06                                                | 1.05                                        | 3.958    |
| Zn-FeN/NG                 | 175.29                                                | 0.44                                        | 4.022    |
| Ni <sub>3</sub> FeN/NG    | 261.85                                                | 0.7182                                      | 4.130    |

Table S2 Details of ORR free energy calculation.

| $\Delta G$ for each step (eV) | $\Delta G1$ | $\Delta G2$ | $\Delta G3$ | $\Delta G4$ | $\eta$ |
|-------------------------------|-------------|-------------|-------------|-------------|--------|
| Ni <sub>3</sub> FeN           | -1.747      | -1.736      | -1.025      | -0.412      | 0.818  |
| Zn-Ni <sub>3</sub> FeN        | -0.543      | -0.479      | -3.211      | -1.687      | 0.751  |

Table S3 Comparison of electrocatalytic activity of the Ni<sub>3</sub>FeN/NG with highly active ORR/OER bifunctional oxygen electrode materials.

| Catalyst                                | E <sub>1/2</sub> (V) | E <sub>j=10</sub> (V) | ΔE / V | Ref.      |
|-----------------------------------------|----------------------|-----------------------|--------|-----------|
| Zn-Ni <sub>3</sub> FeN/NG               | 0.86                 | 1.60                  | 0.74   | This work |
| FeCo/FeCoNi@NCNTs-HF                    | 0.85                 | 1.60                  | 0.75   | [1]       |
| FeCo-NC                                 | 0.86                 | 1.67                  | 0.81   | [2]       |
| Fe <sub>3</sub> C@Fe,N,S-GCM            | 0.80                 | 1.55                  | 0.75   | [3]       |
| MnCo <sub>2</sub> O <sub>4</sub> @C     | 0.80                 | 1.69                  | 0.89   | [4]       |
| CoCoW <sub>12</sub> /NCP                | 0.81                 | 1.58                  | 0.78   | [5]       |
| ZIF-9_Fe3_Pyrol                         | 0.81                 | 1.62                  | 0.81   | [6]       |
| Ag-MnO <sub>2</sub>                     | 0.77                 | 1.58                  | 0.81   | [7]       |
| CoA@CNC                                 | 0.84                 | 1.69                  | 0.85   | [8]       |
| GNCNTs                                  | 0.85                 | 1.60                  | 0.75   | [9]       |
| Co <sub>9</sub> S <sub>8</sub> /N,P-QPC | 0.78                 | 1.59                  | 0.81   | [10]      |
| N-NiO                                   | 0.69                 | 1.50                  | 0.81   | [11]      |
| Co <sub>4</sub> N@NC-m                  | 0.87                 | 1.63                  | 0.76   | [12]      |
| Co-Co <sub>3</sub> O <sub>4</sub> @NAC  | 0.79                 | 1.61                  | 0.82   | [13]      |
| Co <sub>5,47</sub> N@N-rGO              | 0.94                 | 1.81                  | 0.77   | [14]      |

Table S4 Comparison of the Zn-air battery performance of Zn-Ni<sub>3</sub>FeN/NG with highly active ORR/OER bifunctional oxygen electrode materials.

| Sample                                      | Power density (mW cm <sup>-2</sup> ) | Specific capacity (mAh g <sup>-1</sup> ) | cycling performance (h, 10 mA cm <sup>-2</sup> ) | Ref.      |
|---------------------------------------------|--------------------------------------|------------------------------------------|--------------------------------------------------|-----------|
| Zn-Ni <sub>3</sub> FeN/NG                   | 158                                  | 650                                      | 180                                              | This work |
| Fe <sub>3</sub> O <sub>4</sub> @NHCS        | 133                                  | 701                                      | 50                                               | [15]      |
| LSMF                                        | 105                                  | -                                        | 15.6                                             | [16]      |
| Co <sub>4</sub> N@NC                        | 98.6                                 | 644                                      | 200                                              | [17]      |
| FeNiP/NPCS                                  | 163                                  | 602                                      | 110                                              | [18]      |
| Co-NCF                                      | 134                                  | 766                                      | 50                                               | [19]      |
| N-GQDs/NiCo <sub>2</sub> S <sub>4</sub> /CC | 75.2                                 | -                                        | 200                                              | [20]      |
| CoIn <sub>2</sub> Se <sub>4</sub>           | 107                                  | 733                                      | 27                                               | [21]      |
| CoP/NC                                      | 114                                  | 695                                      | 35                                               | [22]      |

## Reference

1. Z. Wang, J. Ang, B. Zhang, Y. Zhang, X. Y. D. Ma, T. Yan, J. Liu, B. Che, Y. Huang and X. Lu, *Appl. Catal. B-Environ.*, 2019, **254**, 26-36.
2. G. Li, K. Zheng and C. Xu, *Appl. Surf. Sci.*, 2019, **487**, 496-502.
3. Z. Y. Li, Q. M. Gao, X. Liang, H. Zhang, H. Xiao, P. Xu and Z. P. Liu, *Carbon*, 2019, **150**, 93-100.
4. S. Cui, L. Sun, F. Kong, L. Huo and H. Zhao, *J. Power Sources*, 2019, **430**, 25-31.
5. Y. Wang, X. Xu, J. Chen and Q. Wang, *J. Power Sources*, 2019, **430**, 201-209.
6. F. Kong, Y. Qiao, C. Zhang, R. Li, T. Cheng, A. Kong and Y. Shan, *Catal. Sci. Technol.*, 2019, **9**, 3469-3481.
7. S. Ni, H. Zhang, Y. Zhao, X. Li, Y. Sun, J. Qian, Q. Xu, P. Gao, D. Wu, K. Kato, M. Yamauchi and Y. Sun, *Chem. Eng. J.*, 2019, **366**, 631-638.
8. M. Shen, K. Gao, F. Xiang, B. Wang, L. Dai, L. Zheng, F. Baker, C. Duan, Y. Zhang, S. Sun and Y. Ni, *J. Power Sources*, 2020, **450**, 227640.
9. Y. Xu, P. Deng, G. Chen, J. Chen, Y. Yan, K. Qi, H. Liu and B. Y. Xia, *Adv. Funct. Mater.*, 2019, **30**, 1906081.
10. X. Hu, Y. Chen, M. Zhang, G. Fu, D. Sun, J.-M. Lee and Y. Tang, *Carbon*, 2019, **144**, 557-566.

11. J. Qian, X. Bai, S. Xi, W. Xiao, D. Gao and J. Wang, *ACS Appl. Mater. Interfaces*, 2019, **11**, 30865-30871.
12. L. Chen, Y. Zhang, X. Liu, L. Long, S. Wang, X. Xu, M. Liu, W. Yang and J. Jia, *Carbon*, 2019, **151**, 10-17.
13. X. Zhong, W. Yi, Y. Qu, L. Zhang, H. Bai, Y. Zhu, J. Wan, S. Chen, M. Yang, L. Huang, M. Gu, H. Pan and B. Xu, *Appl. Catal. B-Environ.*, 2020, **260**, 118188.
14. X. Shu, S. Chen, S. Chen, W. Pan and J. Zhang, *Carbon*, 2020, **157**, 234-243.
15. Y. Li, H. Huang, S. Chen, X. Yu, C. Wang and T. Ma, *Nano Res.*, 2019, **12**, 2774-2780.
16. R.-h. Yuan, Y. He, W. He, M. Ni and M. K. H. Leung, *Appl. Energ.*, 2019, **251**, 113406.
17. L. Chen, Y. Zhang, X. Liu, L. Long, S. Wang, X. Xu, M. Liu, W. Yang and J. Jia, *Carbon*, 2019, **151**, 10-17.
18. J.-T. Ren, Y.-S. Wang, L. Chen, L.-J. Gao, W.-W. Tian and Z.-Y. Yuan, *Chem. Eng. J.*, 2020, **389**, 124408.
19. L. Gao, M. Zhang, H. Zhang and Z. Zhang, *J. Power Sources*, 2020, **450**, 227577.
20. W. Liu, B. Ren, W. Zhang, M. Zhang, G. Li, M. Xiao, J. Zhu, A. Yu, L. Ricardez-Sandoval and Z. Chen, *Small*, 2019, **15**, e1903610.
21. J. Wang, X. Zheng, Y. Cao, L. Li, C. Zhong, Y. Deng, X. Han and W. Hu, *ACS Appl. Mater. Interfaces*, 2020, **12**, 8115-8123.
22. L. Feng, R. Ding, Y. Chen, J. Wang and L. Xu, *J. Power Sources*, 2020, **452**, 227837.
